# Supplementary material
Source: Research Square preprint supplement (doi:10.21203/rs.3.rs-9098129/v1)
Supplement: Supplementary file 1 [file 2025baf911d4d7f312bfaab9.pdf]

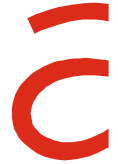

Anhalt University of Applied Sciences, Strenzfelder Allee 28, 06406 Bernburg

Anhalt University of Applied Sciences

**OSENUM Ges. für Energie- und Umweltmanagement e.U.**

Dipl.Kfm. Dirk Osada  
Sternngasse 3/2/6  
1010 Wien  
Österreich

**Center of Life Sciences**

**Managing Director:**  
Prof. Dr.rer.nat. I. Schellenberg

**Institute of Bioanalytical Sciences (IBAS)**  
Head: Prof. Dr.rer.nat. I. Schellenberg

Strenzfelder Allee 28  
D - 06406 Bernburg

fone: +49 3471 355-1188  
fax: +49 3471 355-1189  
e-mail: i.schellenberg@loel.hs-anhalt.de

Bernburg, 03.03.2019

**Auswertung zur Bodenuntersuchung**

|                           |                                                                                        |
|---------------------------|----------------------------------------------------------------------------------------|
| Auftraggeber:             | OSENUM Ges. für Energie- und Umweltmanagement e.U.                                     |
| Adresse Auftraggeber:     | Sternngasse 3/2/6 – Wien                                                               |
| Koordinaten:              | Breitengrad: 47.6206                                                                   |
| Adresse der Liegenschaft: | Längengrad: 23.6114<br>47°37'14" Norden<br>23°36'41" Osten<br>437165 Grosi<br>Rumänien |
| Lage:                     | M. ü. M.: 317 m                                                                        |
| Klima:                    | Dfb                                                                                    |
| Probenbezeichnung:        | O-23-2019                                                                              |
| Probentiefe:              | 0 – 20 cm                                                                              |
| Kultur:                   | Zea mays 2,3 t/ha                                                                      |
| Intern:                   | Nur interner Gebrauch                                                                  |
| Sachbearbeiter:           | Prof.Dr. S. Johné                                                                      |

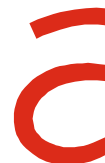

| <b>Bodeneigenschaften O-23-2019</b> |                                                           |             |                   |                                                        |
|-------------------------------------|-----------------------------------------------------------|-------------|-------------------|--------------------------------------------------------|
| <b>Parameter</b>                    |                                                           | <b>Wert</b> | <b>Einstufung</b> | <b>Bemerkung</b>                                       |
|                                     | Bodengruppe                                               | 88          | Gute Bedingung    | Schwerer Boden                                         |
|                                     | ph Wert KCl                                               | 7,4         | Gute Bedingung    | Schwach alkalisch                                      |
|                                     | Ph Wert H <sub>2</sub> O                                  | 8,6         | Sehr hoher Wert   | Mäßig alkalisch                                        |
|                                     | Kalkgehalt CaCO <sub>2</sub> [%]                          | 3,2         | Gute Bedingung    | Gute Säurepufferung                                    |
|                                     | Gelöste Stoffe [el. mS/cm]                                | 2,6         | Zu hoch           | Auswaschung                                            |
|                                     | Humusgehalt [%]                                           | 3,1         | Niedrig           | Organik-Aufbau                                         |
|                                     | Humusqualität [C/N]                                       | 9,0         | Gute Bedingung    | N-Nachlieferung aus Humus                              |
|                                     | Basensättigung                                            | 100         | Zu hoch           | Dynamik eingeschränkt                                  |
|                                     | Ca am Magnet [Ca in % CECp]                               | 22,9        | Sehr gering       | Zu niedrig                                             |
|                                     | Mg am Magnet [Mg in % CECp]                               | 13,8        | Gute Bedingung    | günstig                                                |
|                                     | K am Magnet [K in % CECp]                                 | 0,3         | Sehr gering       | Zu niedrig                                             |
|                                     | Na am Magnet [Na in % CECp]                               | 62,9        | Zu hoch           | Extrem ungünstig                                       |
|                                     | Al am Magnet [Al in % CECp]                               | 0,1         | Gute Bedingung    | günstig                                                |
|                                     | NH <sub>4</sub> N am Magnet [NH <sub>4</sub> N in % CECp] | 0,3         | Gute Bedingung    | günstig                                                |
|                                     | Fe am Magnet [Fe in % CECp]                               | 0,1         | Gute Bedingung    | günstig                                                |
|                                     | Mn am Magnet [Mn in % CECp]                               | 0,2         | Gute Bedingung    | günstig                                                |
|                                     | H am Magnet [H in % CECp]                                 | 0,1         | Sehr gering       | Aktuelle Säure gering                                  |
|                                     | Säure am Magnet [pS in % CECp]                            | 0,0         | Sehr gering       | Zu niedrig                                             |
| <b>Stoff pflanzenverfügbar</b>      |                                                           | <b>Wert</b> | <b>Einstufung</b> | <b>Bemerkung</b>                                       |
|                                     | C org in kg/ha                                            | 43580       | Gutes Verhältnis  | Humusaufbau                                            |
|                                     | N total in kg/ha                                          | 4800        | Gute Bedingung    | Vorhandene N Reserven                                  |
|                                     | Ca pflanzenverfügbar in kg/ha                             | 1083        | Gute Bedingung    | Aktuell ausreichend                                    |
|                                     | Mg pflanzenverfügbar in kg/ha                             | 410         | Gute Bedingung    | Aktuell ausreichend                                    |
|                                     | K pflanzenverfügbar in kg/ha                              | 33          | Gering            | Mangel / K-Zugabe 40 kg/ha                             |
|                                     | PO <sub>4</sub> pflanzenverfügbar in kg/ha                | 43          | Gering            | Mangel / PO <sub>4</sub> -Zugabe 45 kg/ha              |
|                                     | NH <sub>4</sub> -N in kg/ha                               | 5,2         | Sehr gering       | Starker Mangel / NH <sub>4</sub> -N-Zugabe 15-20 kg/ha |
|                                     | NO <sub>3</sub> -N in kg/ha                               | 0,1         | Sehr gering       | Starker Mangel / NO <sub>3</sub> -N Zugabe 110 kg/ha   |
|                                     | Nmin in kg/ha                                             | 4,3         | Sehr gering       | Starker Mangel / N Zugabe 140 kg/ha                    |
|                                     | SO <sub>4</sub> pflanzenverfügbar in kg/ha                | 582,5       | Zu hoch           | Extremer Überschuss - Humusaufbau                      |
|                                     | Fe pflanzenverfügbar in kg/ha                             | 0,8         | Sehr gering       | Starker Mangel / Fe Zugabe 8-10 kg/ha                  |
|                                     | Mn pflanzenverfügbar in kg/ha                             | 5,13        | Hoch              | Überschuss – Humusaufbau                               |
|                                     | Cu pflanzenverfügbar in kg/ha                             | 0,09        | Hoch              | Überschuss – Humusaufbau                               |
|                                     | Zn pflanzenverfügbar in kg/ha                             | 0,02        | Sehr gering       | Starker Mangel / Zn Zugabe 3 kg/ha                     |
|                                     | Mo pflanzenverfügbar in kg/ha                             | 0,18        | Hoch              | Überschuss – Humusaufbau                               |
|                                     | B pflanzenverfügbar in kg/ha                              | 2,48        | Hoch              | Überschuss – Humusaufbau                               |
|                                     | Cr, Pb, Cd, Ni, in Kg/ha                                  |             | Zu hoch           | Kontaminierungsgefahr                                  |

Tabelle 1: Pflanzenverfügbare Stoffe ermittelt zum Zeitpunkt der Bodenentnahme. Die Zufuhr von Nährstoffen ergibt aus der Differenz zum Pflanzenbedarf während der gesamten Pflanzperiode und ist dem Rekultivierungsgrad anzupassen.

|                |                  |                   |
|----------------|------------------|-------------------|
| Basisparameter | Sorptionskomplex | Pflanzenernährung |
|----------------|------------------|-------------------|



## Basiseigenschaften

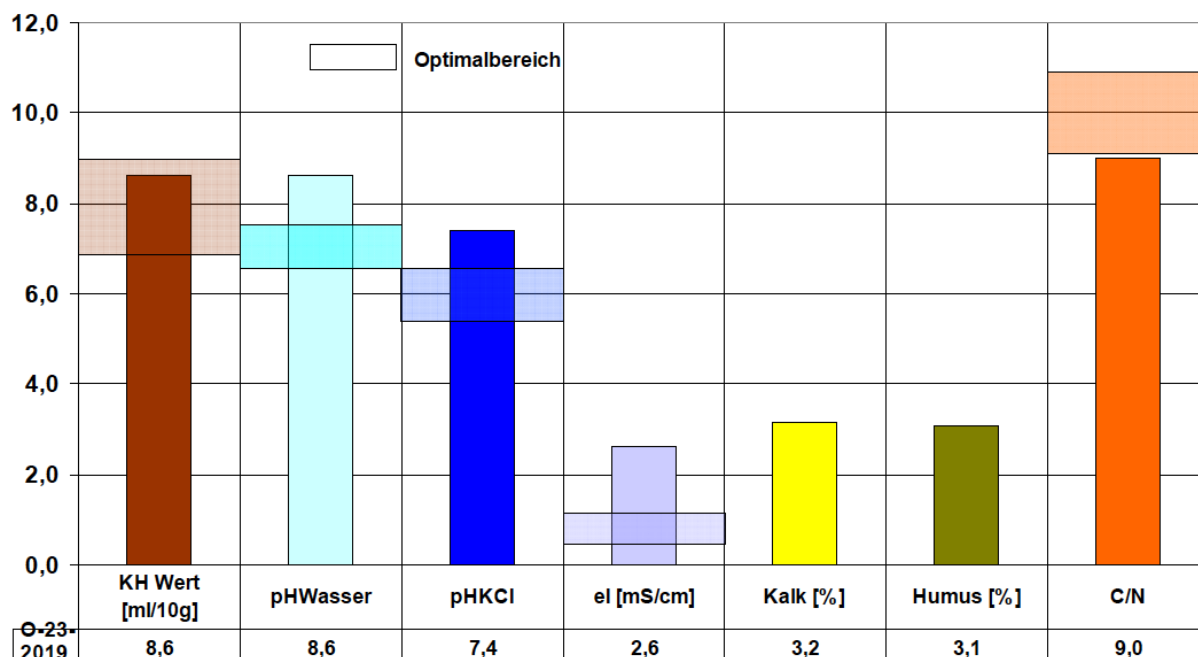

Abb. 1: Basiseigenschaften des Bodens, hellgrauer Bereich aus Tabelle 1

Die uns zur Verfügung gestellte Bodenprobe fühlt sich seifig – schmierig an und ähnelt einer Knetmasse. Die Probe wird gekennzeichnet durch eine dunkelbraue Farbe und einem neutralen Geruch. Es konnten keine Aggregate oder Brocken festgestellt werden. Wurzeln und Bodenlebewesen konnten makroskopisch nicht ermittelt werden, ebenso keine Mineralteilchen größer 5 mm.

Die tonhaltige Bodenart bedingt einen schweren Boden. Bei voller Wassersättigung kann der Boden ~ 8,6 ml Wasser pro 10g zurückhalten. Dies entspricht einer Wassermenge von 1120m<sup>3</sup>/ha bei einer Tiefe von 20 cm. Der Wert ist allerdings nur von theoretischer Bedeutung, da der Boden nur verzögert Niederschlagswasser aufnehmen und abgeben kann. Der hohe Salzgehalt weist eine negative Wasserbilanz auf (Niederschlag < Verdunstung).

Die Aggregatstabilität ist sehr schlecht, welches beim Ausschütten der Probe mit Wasser sichtbar wurde, weil das überstehende Wasser stark getrübt war durch die Suspensierung von Bodenteilchen. Der Boden ist völlig strukturlos, welches zu massiven Problemen im Wasser- und Lufthaushalt führt.

Der pH<sub>Wasser</sub> liegt im mäßig saurem Bereich(8,6), im Neutralsalz liegt der pH Wert (KCl) bei schwach alkalischen 7,4. Das Puffersystem liegt im Bereich des Karbonatpuffers. Aufgrund des hohen Salzgehaltes und des hohen pH Wertes ist mit einer stark eingeschränkten mikrobiologischen Aktivität zu rechnen.

Die elektrische Leitfähigkeit kennzeichnet die Menge an gelösten Salzen. Sie beträgt 2,6 mS/cm und liegt weit oberhalb des günstigen Bereiches von 0,5-1 für die Vegetationsperiode. Die gelösten Salze sind wichtig für die Pflanzenernährung über

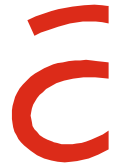

den Transpirationssog und für die Aggregatsstabilität. Der Standort ist sorptionsstark. Es muss bei Regen trotzdem mit Auswaschungen gerechnet werden.

Folgende Elemente sind in der Bodenlösung für die elektrische Leitfähigkeit verantwortlich:

| Nährstoff             | O-23-2019 Bodenprobe |
|-----------------------|----------------------|
| <b>Ca</b>             | <b>22,9</b>          |
| <b>Mg</b>             | <b>5</b>             |
| <b>K</b>              | <b>3</b>             |
| <b>Na</b>             | <b>533</b>           |
| <b>NH4-N</b>          | <b>0</b>             |
| <b>NO3-N</b>          | <b>0</b>             |
| <b>PO<sub>4</sub></b> | <b>4</b>             |
| <b>SO<sub>4</sub></b> | <b>283</b>           |
| <b>Cl</b>             | <b>95</b>            |
| <b>Al</b>             | <b>0</b>             |
| <b>Fe</b>             | <b>0,3</b>           |
| <b>Mn</b>             | <b>0,18</b>          |
| <b>B</b>              | <b>1,17</b>          |
| <b>Zn</b>             | <b>0</b>             |
| <b>Cu</b>             | <b>0,08</b>          |
| <b>Si</b>             | <b>3,6</b>           |
| <b>Ni</b>             | <b>0,13</b>          |
| <b>Cr</b>             | <b>0,02</b>          |

Tabelle 2: Zusammensetzung der Bodenlösung, Konzentrationen in mg/l

Die Bodenlösung ist das wichtigste Medium für die Pflanzenernährung. Die Wurzeln können ausschließlich gelöste Stoffe aufnehmen. Die Bodenlösung sollte als „Idealzusammensetzung“ der einzelnen Nährstoffe, vorliegen, da die Selektivität der Pflanzenaufnahme für bestimmte Nährstoffe nur aus der „Ideallösung“ heraus funktioniert.

Die Bodenlösung weist eine extreme Zusammensetzung auf und wäre typisch für Salzböden (Pelosol, Solonetz, Solontschack). Zur ackerbaulichen Nutzung sind diese Böden nur bedingt geeignet. Im Regelfall sind diese Böden als „wertvoll“ und „selten“ einzustufen und werden unter Naturschutz gestellt, da diese Extrembedingungen Lebensraum für seltenen Pflanzen und Tieren gewährt.

K ist im Verhältnis zu Mg und Ca in zu geringer Konzentration gelöst. Die PO<sub>4</sub> Konzentration liegt im mittleren Bereich. Die Spurenelementeversorgung ist bis auf Zn, gut. Die wasserlöslichen Anteile an Na, SO<sub>4</sub> und Cl sind massiv erhöht. Zudem wurden beachtliche mengen von den potentiell toxischen Stoffen Ni und Cr gefunden.

Der Humusgehalt ist für den Ackerstandort dieser Schwereklasse als günstig anzusehen.



Das C/N Verhältnis von 9,0 ist relativ eng. Die Humusform ist Mull. Bei günstigem Witterungsverlauf kann mit einer jährlichen N Nachlieferung aus dem Humuspool von 50 – 70 kg/ha gerechnet werden.

### Sorptionskomplex:

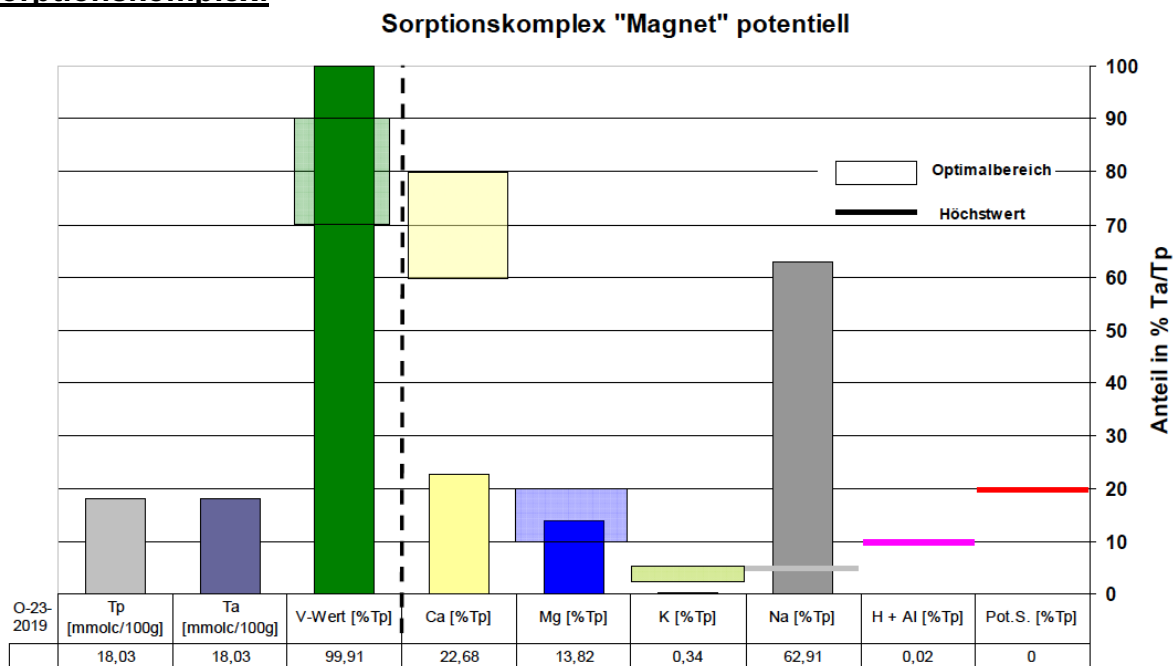

Abb. 2: Zusammensetzung des Sorptionskomplex, hellgrüner Bereich aus Tabelle 1

Der Humus und die Tonteilchen können im Boden Nährstoffe anlagern und gegenüber Auswaschung schützen. Sie wirken wie „Magneten“, da sie eine Ladung besitzen und werden als Sorptionskomplex/Austauscher bezeichnet. Die Stärke der Magneten, das heißt die Anzahl der Ladungen die angelagert werden können, wird Austauschkapazität (T-Wert, CEC) genannt.

Beim untersuchten Boden beträgt die Gesamtkapazität (Tp) der Magneten 18 mmole/100g und ist vorwiegend auf den Humus und weniger auf die Tonminerale, Oxide und Hydroxide zurückzuführen. Derzeit werden 100% davon genutzt, der Boden ist aktuell als sorptionsstark zu bezeichnen.

Die Basensättigung liegt mit 99% deutlich oberhalb des gewünschten Bereiches (70-90%), das Vermögen weitere Säureeinträge abzufuffern ist extrem ausgeprägt.

Die Belegung des Magneten mit Nährstoffen ist ein wichtiger Parameter zur Beurteilung der Bodenfruchtbarkeit. Optimale Verhältnisse herrschen, wenn:

|                  | Ca    | : | Mg    | : | K     | : | Na   | : | (H+Al) |
|------------------|-------|---|-------|---|-------|---|------|---|--------|
| <b>SOLL:</b>     | 60-80 |   | 10-20 |   | 1,5-4 |   | <5   |   | <10    |
| <b>O-23-2019</b> | 22,7  |   | 13,8  |   | 0,3   |   | 62,9 |   | 0,0    |



Die Pflanzenwurzeln und Mikroorganismen finden eine extrem ungünstige Verteilung von Stoffen am Sorptionskomplex vor.

Der Anteil von Na ist extrem hoch und überlagert alle weiteren Parameter. Sollte es tatsächlich die Intention des Landwirtes sein, diesen Standort landwirtschaftlich zu nutzen und zu meliorieren, muss der Anteil von Na zurückgedrängt werden. Dies gelingt durch eine Kombination von Maßnahmen:

- Ausbringen von Gips und Kalk als Ca Lieferanten
- Bewässerung
- Entwässerung

Es darf in weiterer Folge zu keinem Aufstieg des Grundwassers kommen, da dieses zu salzreich ist. Die Verfrachtung der leicht löslichen Elemente darf nur von Oben nach Unten gerichtet sein.

### Beurteilung der Nährstoffe

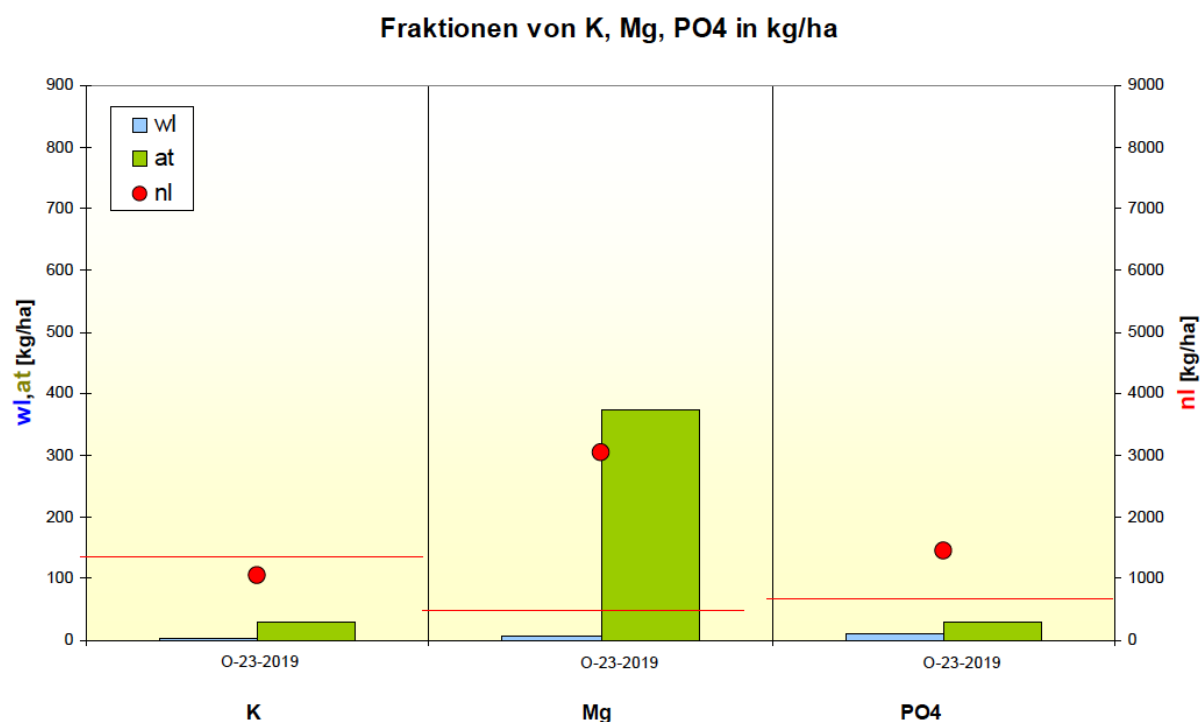

Abb. 3: Fraktionen der Nährstoffe K, Mg, PO<sub>4</sub> (wl=wasserlöslich, at=austauschbar, nl=nachlieferbar)

### *Kalium*

| Element | Verfügbarkeit | Menge (kg/ha) | Bemerkung   |
|---------|---------------|---------------|-------------|
| K       | wasserlöslich | 3,1           | Mangel      |
| K       | austauschbar  | 29            | Mangel      |
| K       | nachlieferbar | 1050          | Gut gefüllt |



## Magnesium

| Element | Verfügbarkeit | Menge (kg/ha) | Bemerkung        |
|---------|---------------|---------------|------------------|
| Mg      | wasserlöslich | 5,6           | ausreichend      |
| Mg      | austauschbar  | 373           | ausreichend      |
| Mg      | nachlieferbar | 3050          | Sehr gut gefüllt |

## Phosphor

| Element         | Verfügbarkeit | Konzentration mg/l | Menge kg/ha | Bemerkung      |
|-----------------|---------------|--------------------|-------------|----------------|
| PO <sub>4</sub> | wasserlöslich | 4,0                | 10,9        | ausreichend    |
| PO <sub>4</sub> | austauschbar  |                    | 29          | Mangel         |
| PO <sub>4</sub> | nachlieferbar |                    | 1450        | Mittel gefüllt |

Die PO<sub>4</sub> Konzentration in der Bodenlösung beträgt 4,0mg/l und liegt innerhalb des Bereiches für eine gute Pflanzenentwicklung. Insgesamt sind PO<sub>4</sub> ca. 40kg/ha in pflanzenverfügbarer Form vorhanden.

Dies ist nicht ausreichend.

Der Reservepool ist mit PO<sub>4</sub> ca. 1450kg/ha mittel aufgefüllt. Zur nachhaltigen Sicherung der PO<sub>4</sub> Versorgung sollten Maßnahmen gesetzt werden, die nachhaltige P aus dem Reservepool zu mobilisieren.

Dazu eignen sich mehrere Strategien wie zum Beispiel:

- Salzmelioration
- Förderung der mikrobiellen Aktivität durch Verbesserung der Durchlüftung, Versorgung mit Spurenelementen
- Ionenkonkurrenz
- Anbau P-aufschließender Pflanzen und Pilze (Mykorrhiza, weiße Lupinie)

## Spurenelemente

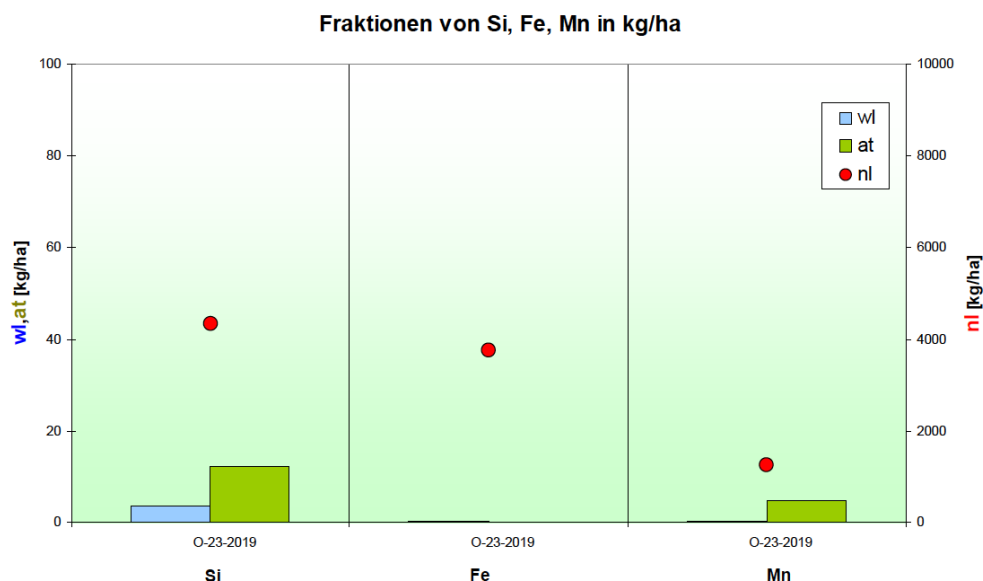

Abb. 4: Fraktionen der Nährstoffe Si, Fe, Mn (wl=wasserlöslich, at=austauschbar, nl=nachlieferbar)

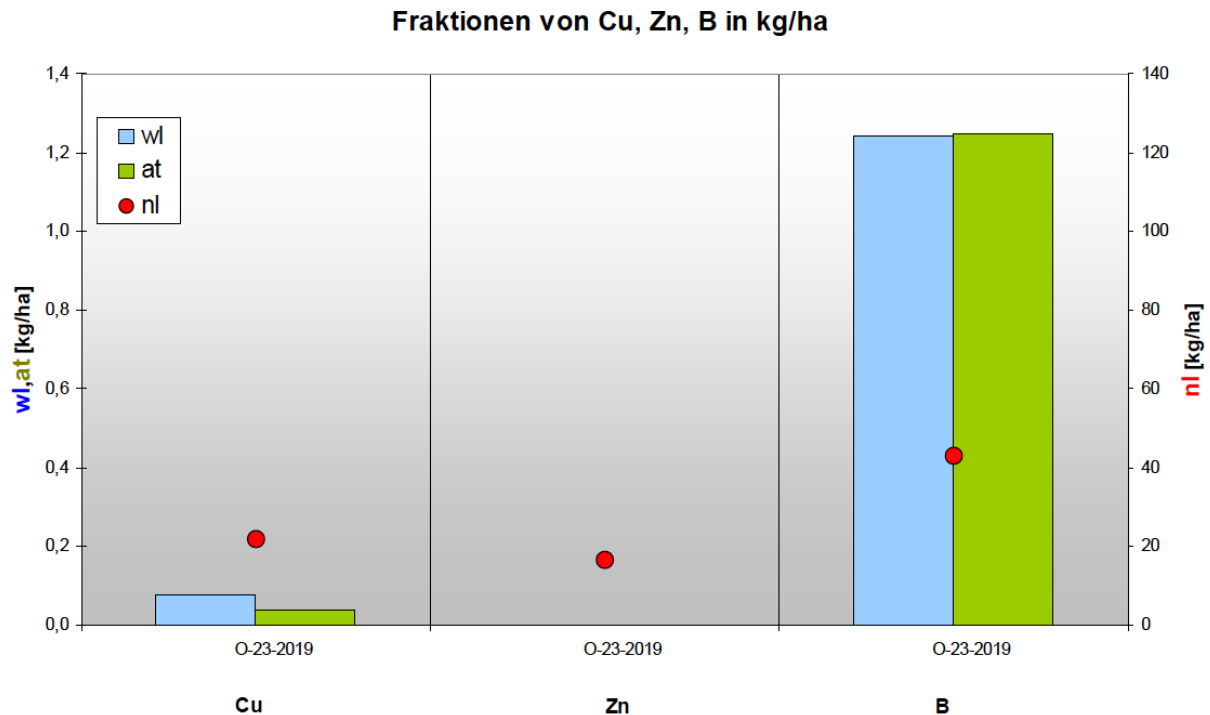

Abb. 5: Fraktionen der Nährstoffe Cu, Zn, B (wl=wasserlöslich, at=austauschbar, nl=nachlieferbar)

| Element | Pflanzenverfügbar kg/ha | Reservepool kg/ha | Empfohlene Zugabe über den Boden kg/ha |
|---------|-------------------------|-------------------|----------------------------------------|
| Si      | 16                      | 4340              | Si kann PO <sub>4</sub> mobilisieren   |
| Fe      | 0                       | 3760              | 8,0                                    |
| Mn      | 4,99                    | 1250              | keine                                  |
| Cu      | 0,12                    | 21,7              | keine                                  |
| Zn      | 0,00                    | 16,6              | 2,9                                    |
| Co      | 0,01                    | 9,4               | keine                                  |
| Mo      | 0,13                    | 0,00              | keine                                  |
| B       | 2,49                    | 42,94             | keine                                  |

Achtung: Überschüsse bei Mangan, Kupfer, Molybdän und Bor

#### Toxische Elemente

Die löslichen Anteile von Chrom (Cr) und Nickel (Ni) können in den Kulturpflanzen angereichert werden, welches Gefahr für Mensch und Tier bedeutet. Zudem können Nachbarsysteme, wie das Grundwasser kontaminiert werden.

Mit freundlichen Grüßen

Prof. Dr. rer. nat. I. Schellenberg
